# Supplementary material
Source: publisher figshare collection journal article supplement (https://tandf.figshare.com/ndownloader/files/15658412)
Supplement: Supplementary file 1 [file 15658412]

**Supplements**

**
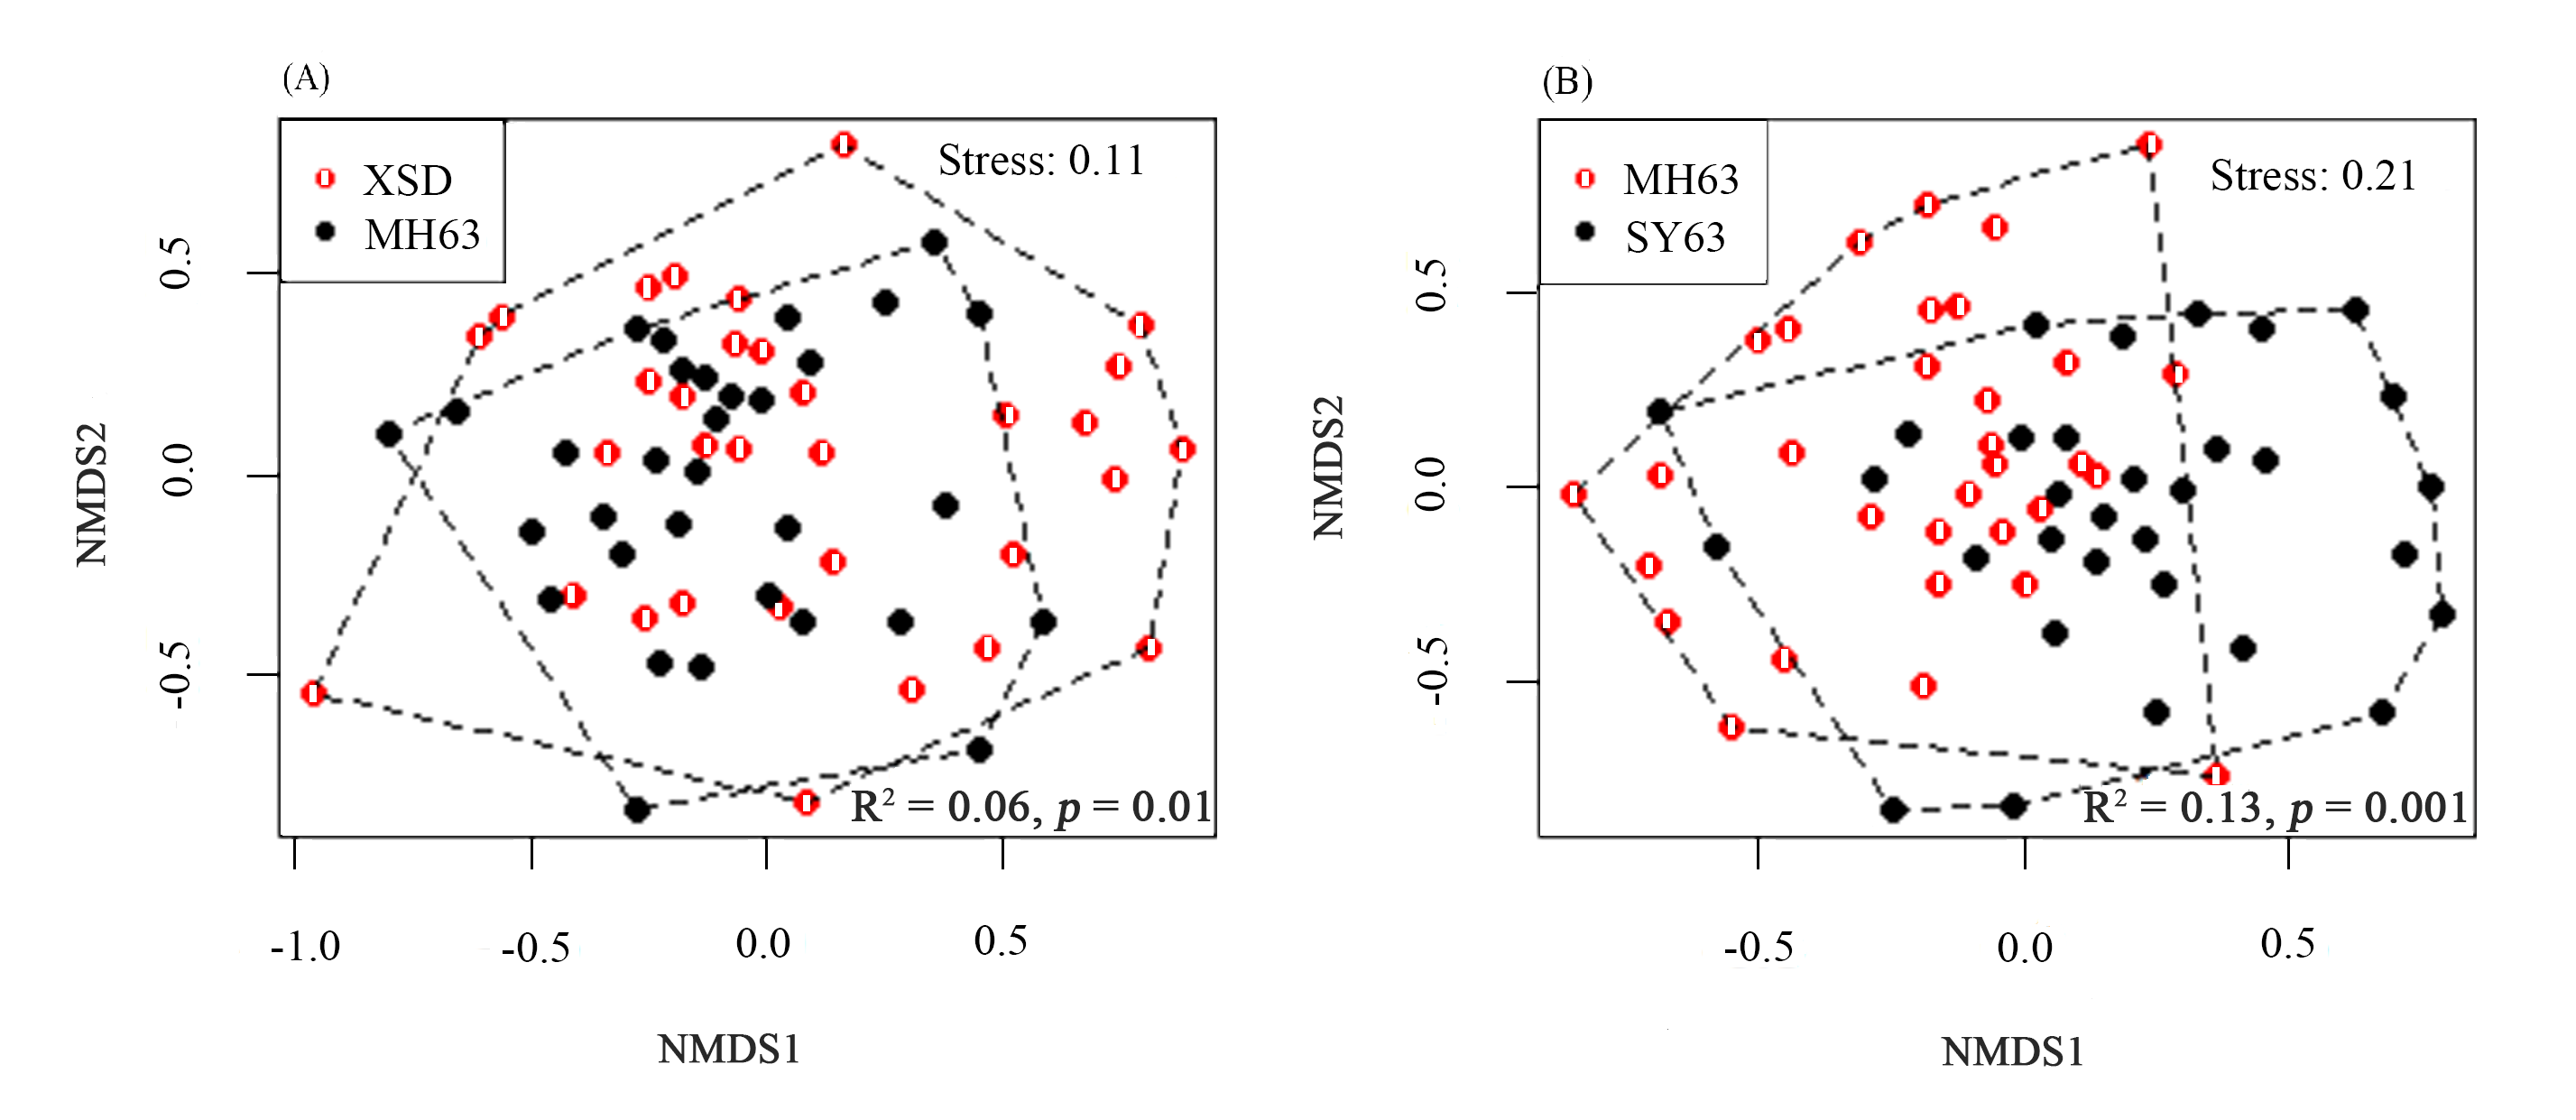
**

**Figure S1.** The dissimilarity of soil mite community composition using non-metric multidimensional scaling (NMDS) based on Bray-Curtis distance analysis in the paddy fields of non-*Bt* rice (cv. XSD; cv. MH63; cv. SY63).


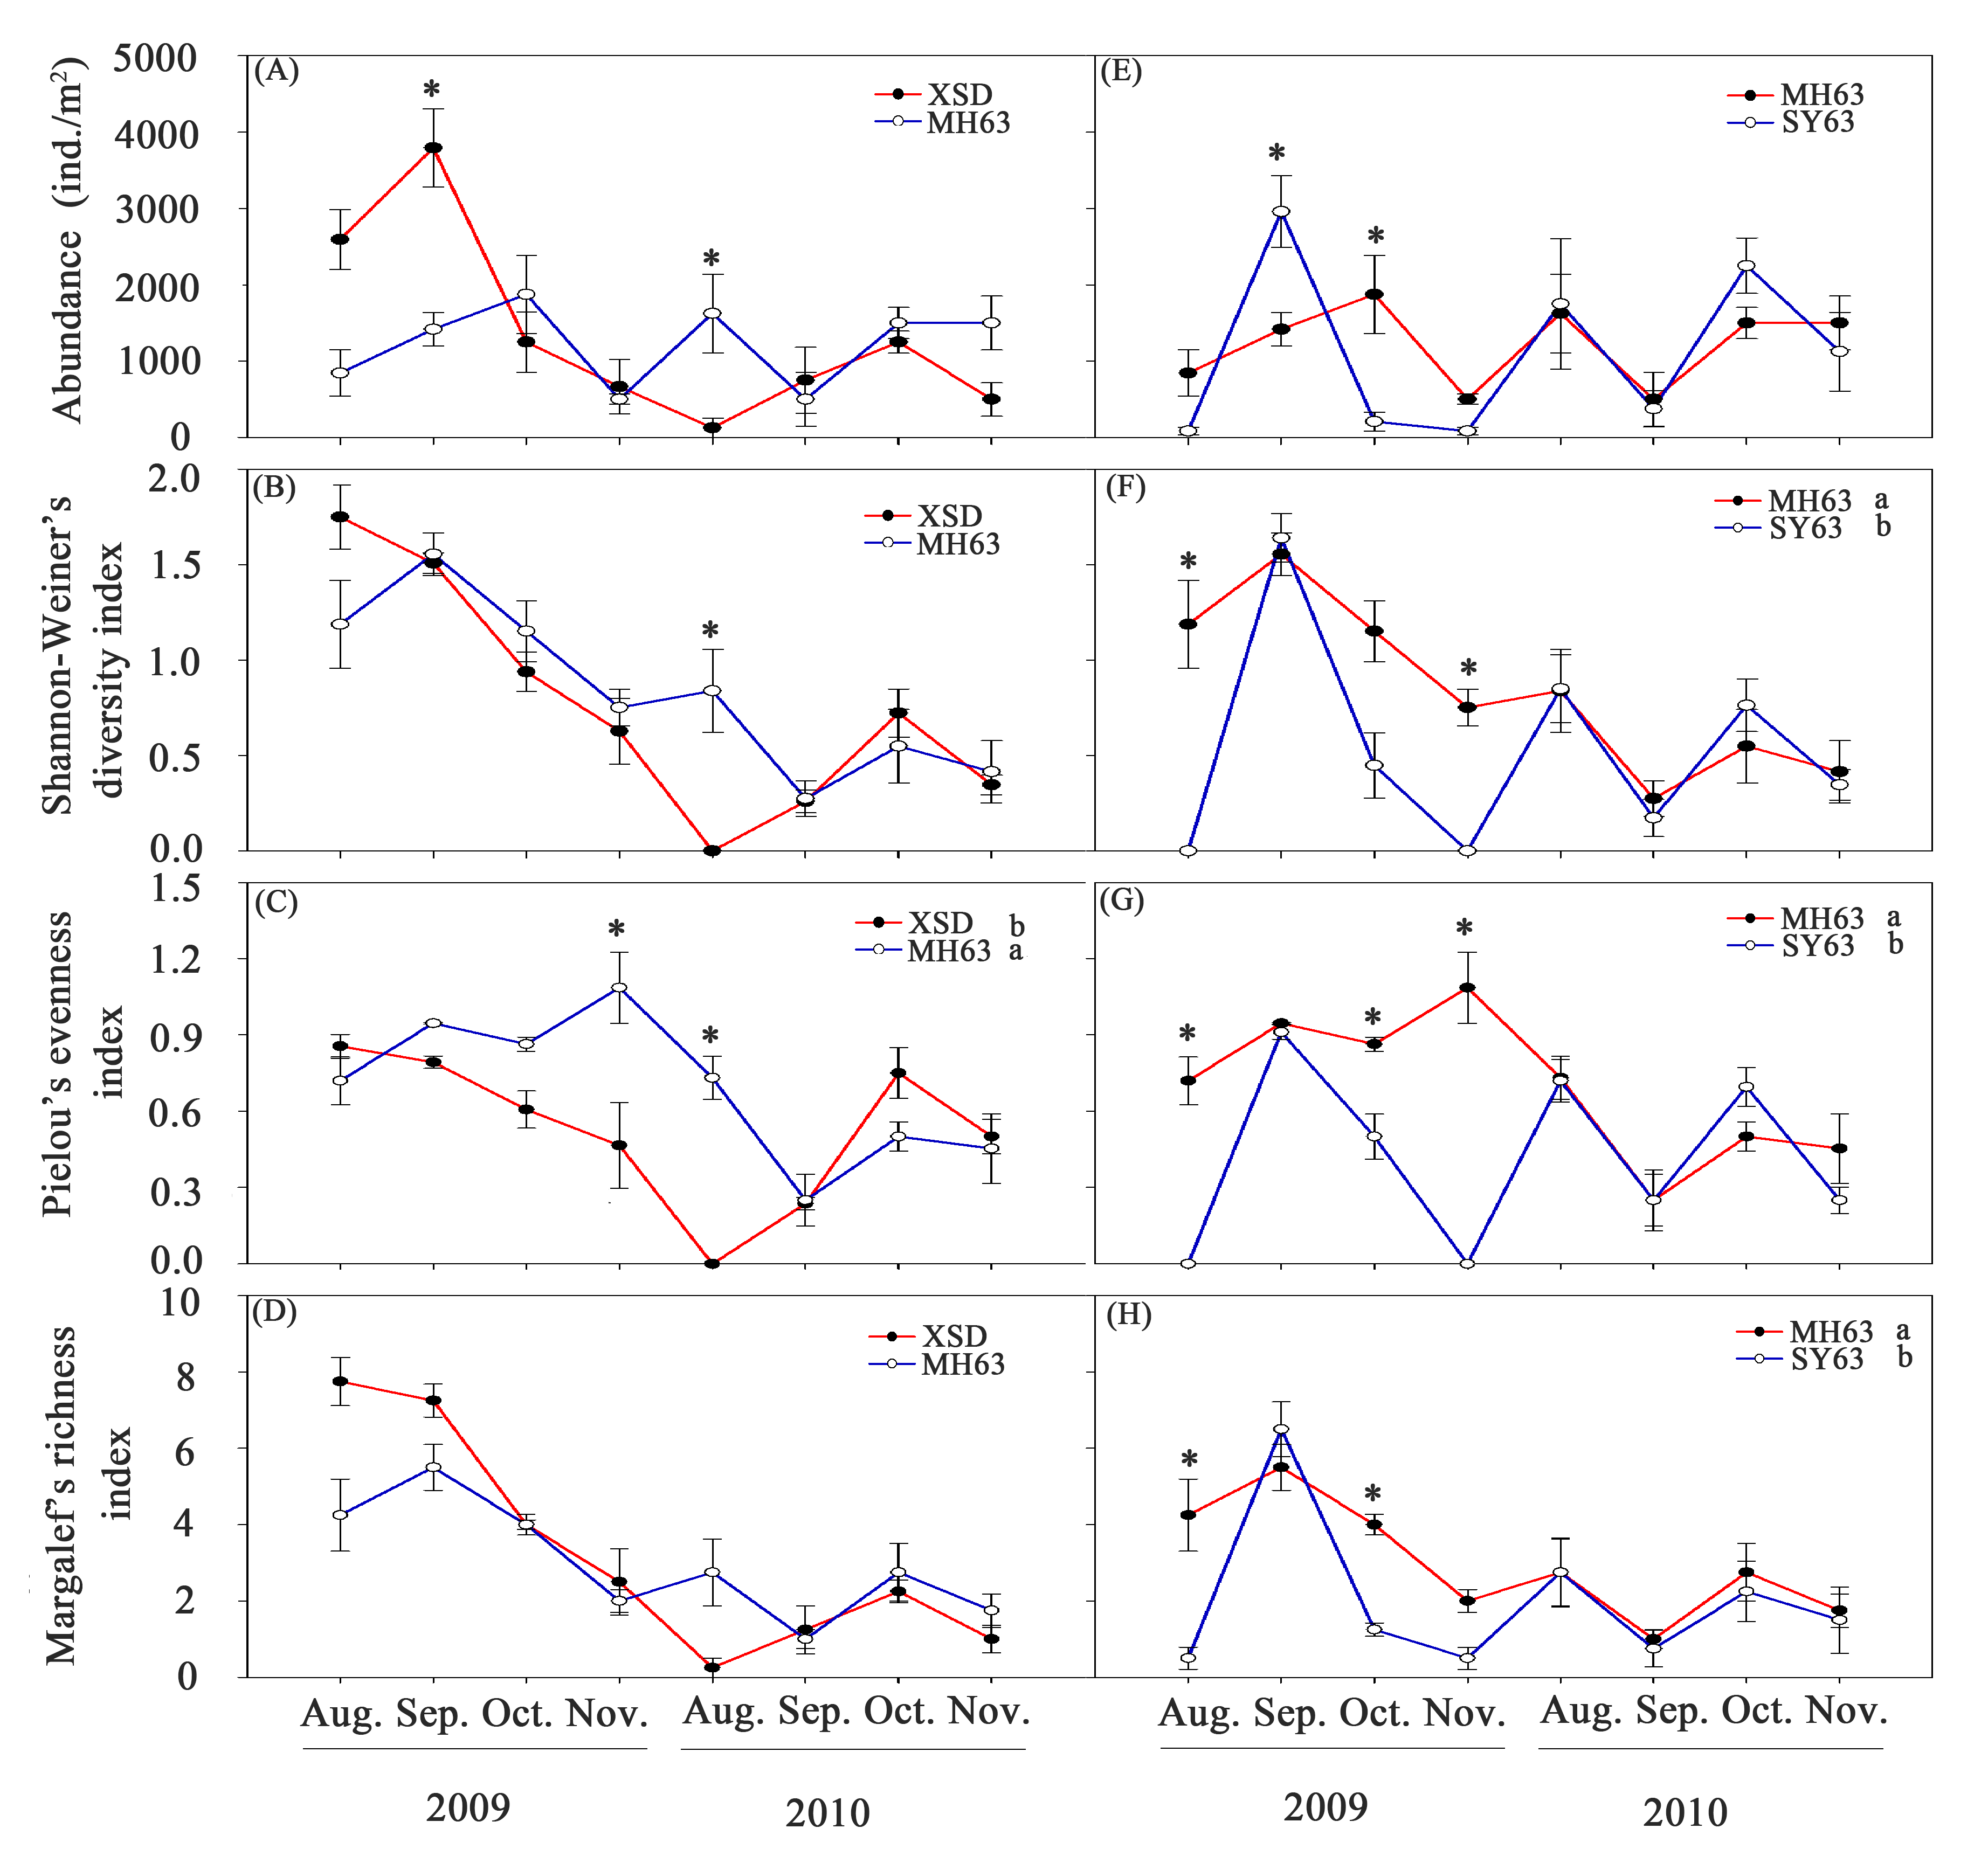


**Figure S2.** Dynamics of the abundance (A and E) and the community indexes of Shannon diversity (*H’*: B and F), Pielou evenness (*J*: C and G) and Margalef richness (*SR*: D and H) of soil mites inthe paddy fields of the non-*Bt* rice (cv. XSD: A, B, C, and D; cv. MH63: A, B, C, D, E, F, G and H; cv. SY63: E, F, G and H) (* indicated significant differences between rice cultivars (cv. XSD vs. cv. MH63; cv. MH63 vs. cv. SY63) at each field sampling time by the LSD test at *p* < 0.05, respectively; different lowercase letters indicated significant differences over a 2-year cultivation period by the LSD test at *p* < 0.05, respectively).
